# Supplementary material for: The Protective Effect of Edaravone on TDP-43 Plus Oxidative Stress-Induced Neurotoxicity in Neuronal Cells: Analysis of Its Neuroprotective Mechanisms Using RNA Sequencing
Source: MDPI journal article supplement (doi:10.3390/ph15070842), 2022-07-08
Supplement: s1 [file s1]

Supplemental Data

## The protective effect of edaravone on TDP-43 plus oxidative stress-induced neurotoxicity in neuronal cells: Analysis of its neuroprotective mechanisms using RNA sequencing

Aki Soejima-Kusunoki <sup>1,\*</sup>, Kinya Okada <sup>2</sup>, Ryuta Saito <sup>2</sup> and Kazuhiko Watabe <sup>3</sup>

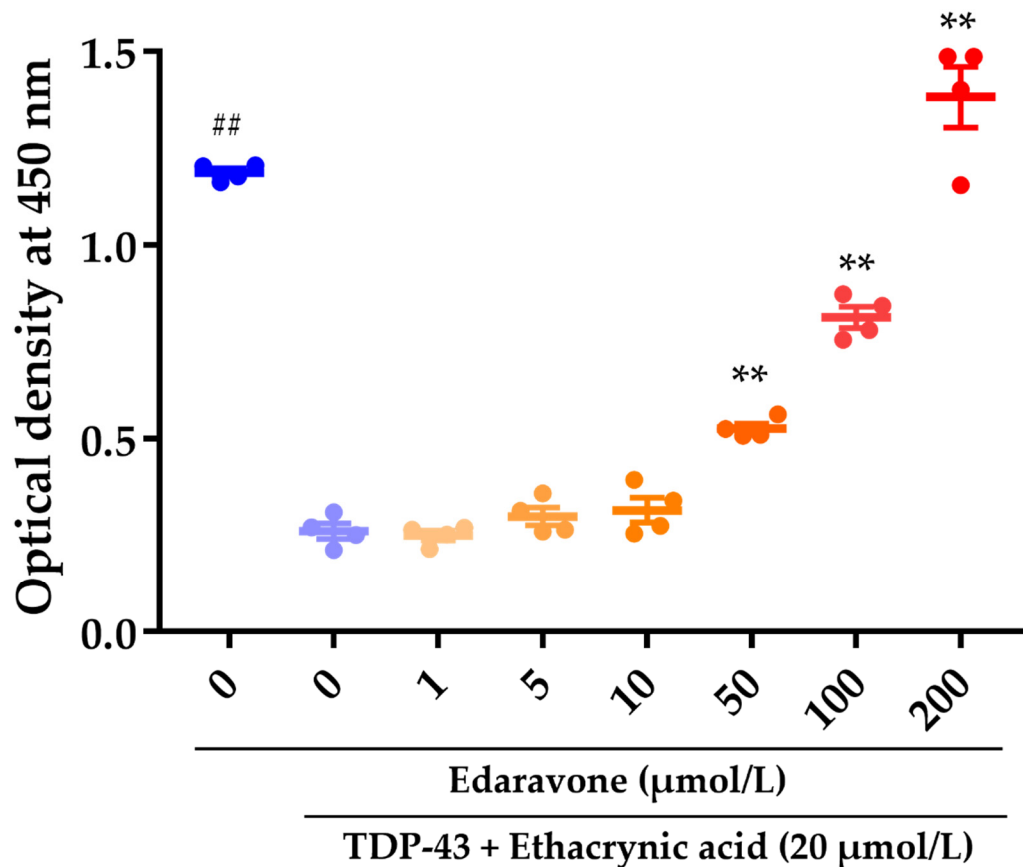

Figure S1. Effects of edaravone (simultaneous treatment with etacrynic acid for 24 h) against neurotoxicity in cells transduced with adenoviruses expressing WT and CTF TDP-43

Neurotoxicity was analyzed as a decrease in cell viability using the CCK-8 assay. Data are expressed as mean  $\pm$  standard error of the mean (SEM) (n = 4 wells in 1 experiment). ##p < 0.01 compared to

the group of TDP-43 plus ethacrynic acid (Student t-test).  $**p < 0.01$  compared to the group of TDP-43 plus ethacrynic acid (Williams' multiple comparison test).

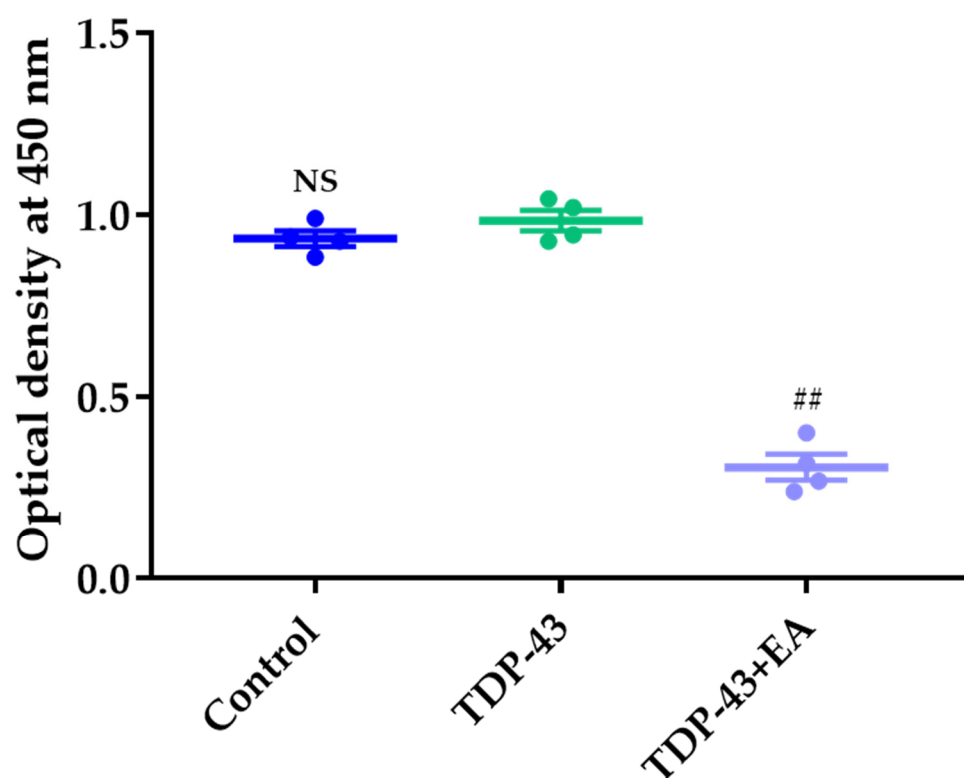

Figure S2. Cell viability of 1464R-derived cells expressing TDP-43 for 48 h and the effect of etacrynic acid (EA) treatment for 24 h following expression of TDP-43. Data expressed as mean  $\pm$  SEM (N = 4). ##P < 0.01; NS: Not significant vs. TDP-43 (t-test).

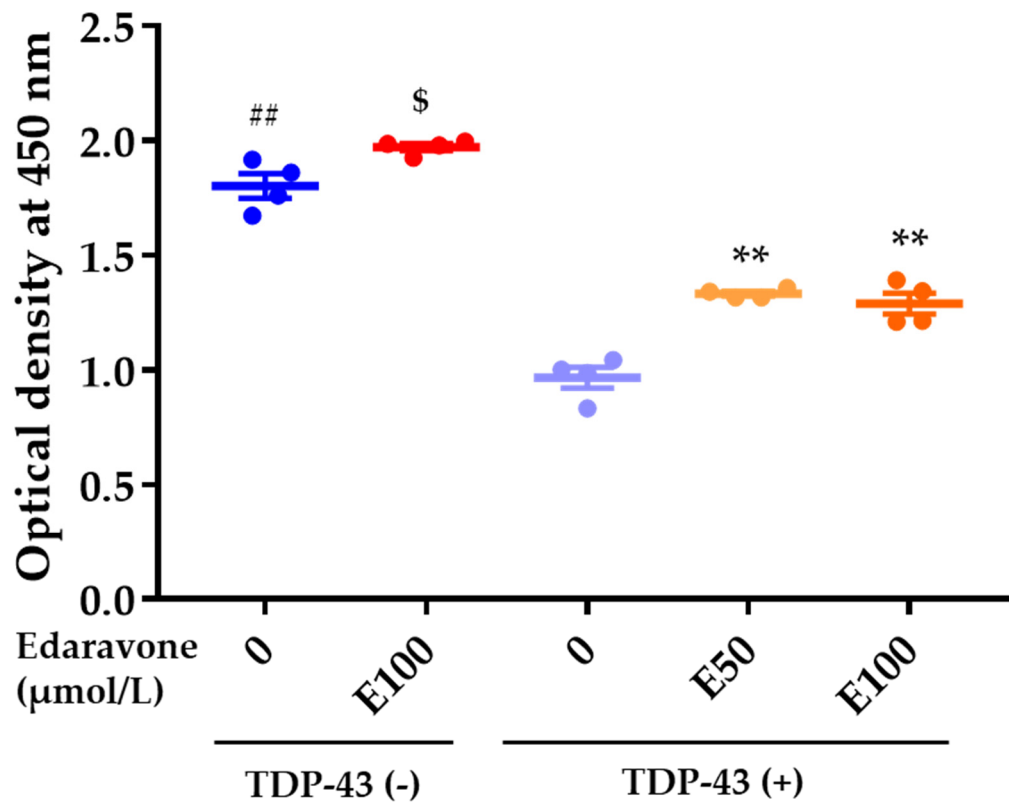

Figure S3. Effects of edaravone on TDP43-expression-induced neurotoxicity without ethacrynic acid in rat neural stem cell-derived neurons

Normal or TDP-43-expressed cells were maintained for 48 h, and edaravone at various concentrations was treated for another 48 h. The neurotoxicity was analyzed as a decrease in cell viability with the CCK-8 assay. Data expressed as mean  $\pm$  SEM (N = 4). ##P < 0.01 vs. TDP43 (+) control (t-test); \*\*P < 0.01 vs. TDP43 (+) control (Williams' multiple comparison test); \$p < 0.05 vs. TDP-43 (-) control (t-test).

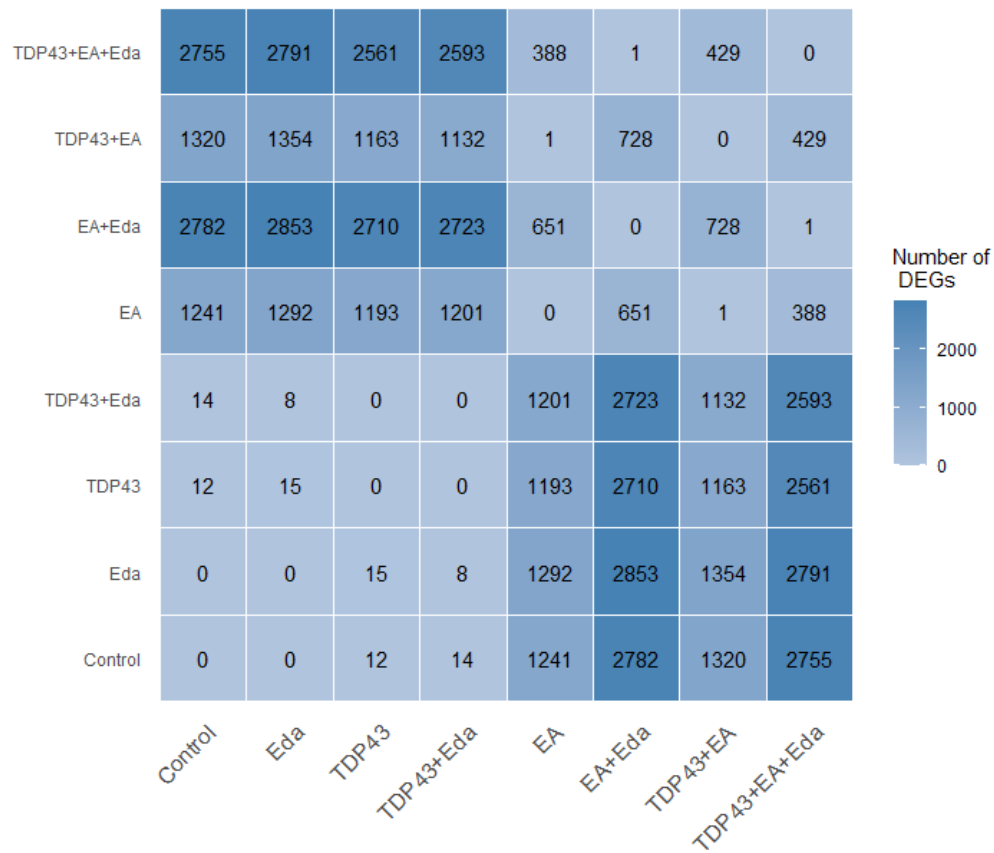

Figure S4. The heatmap of the number of DEGs by inter-group comparative analysis to all combinations

EA, ethacrynic acid; Eda, Edaravone; TDP-43, TDP-43-expressed cells.

The number of DEGs in normal control vs. TDP-43-expressed, normal control vs normal control + EA, normal control vs. TDP-43-expressed+ EA, TDP-43-expressed vs. TDP-43-expressed + EA was 12, 1241, 1320, and 1163, respectively.

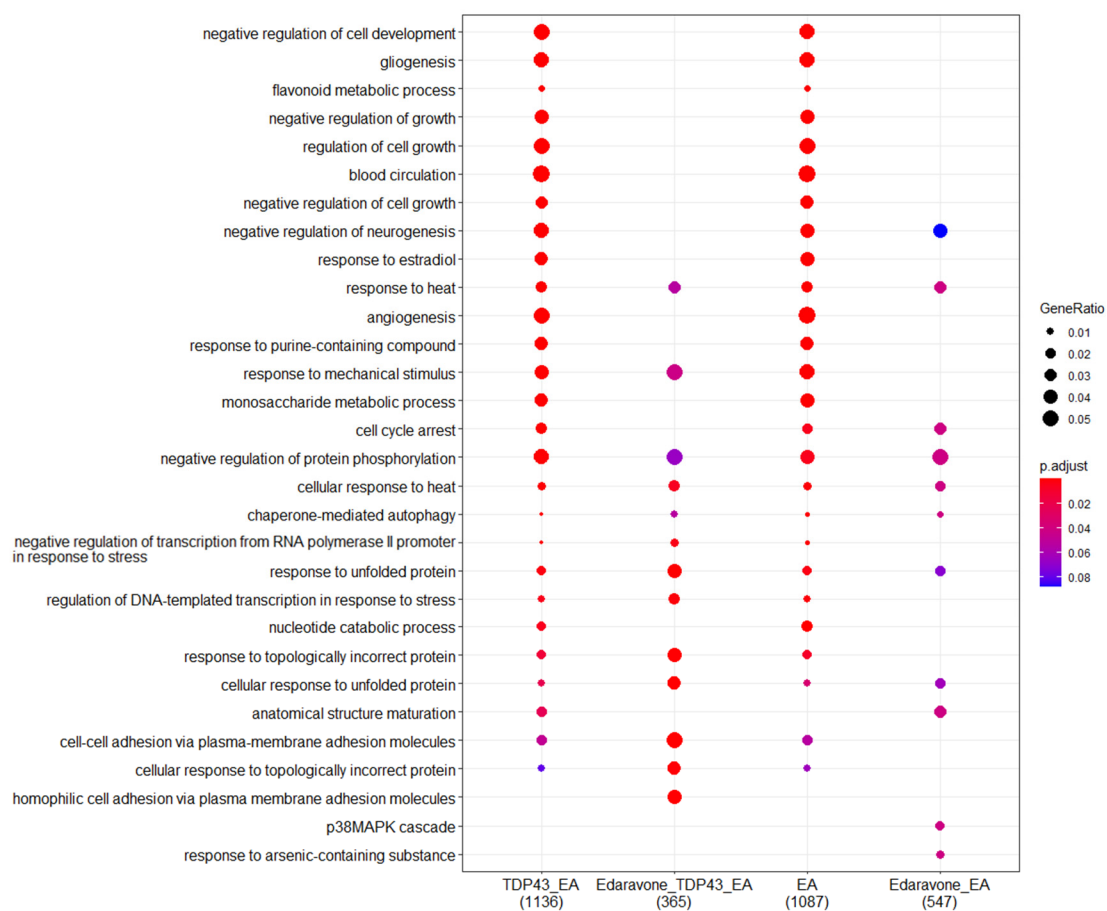

Figure S5. GO enrichment analysis about pharmacological effects of edaravone and/or ethacrynic acid (EA) treatment in TDP-43 expressed and normal cells

DEGs of edaravone treatment were enriched in similar GO categories in EA-treated normal and TDP-43-expressed cells.

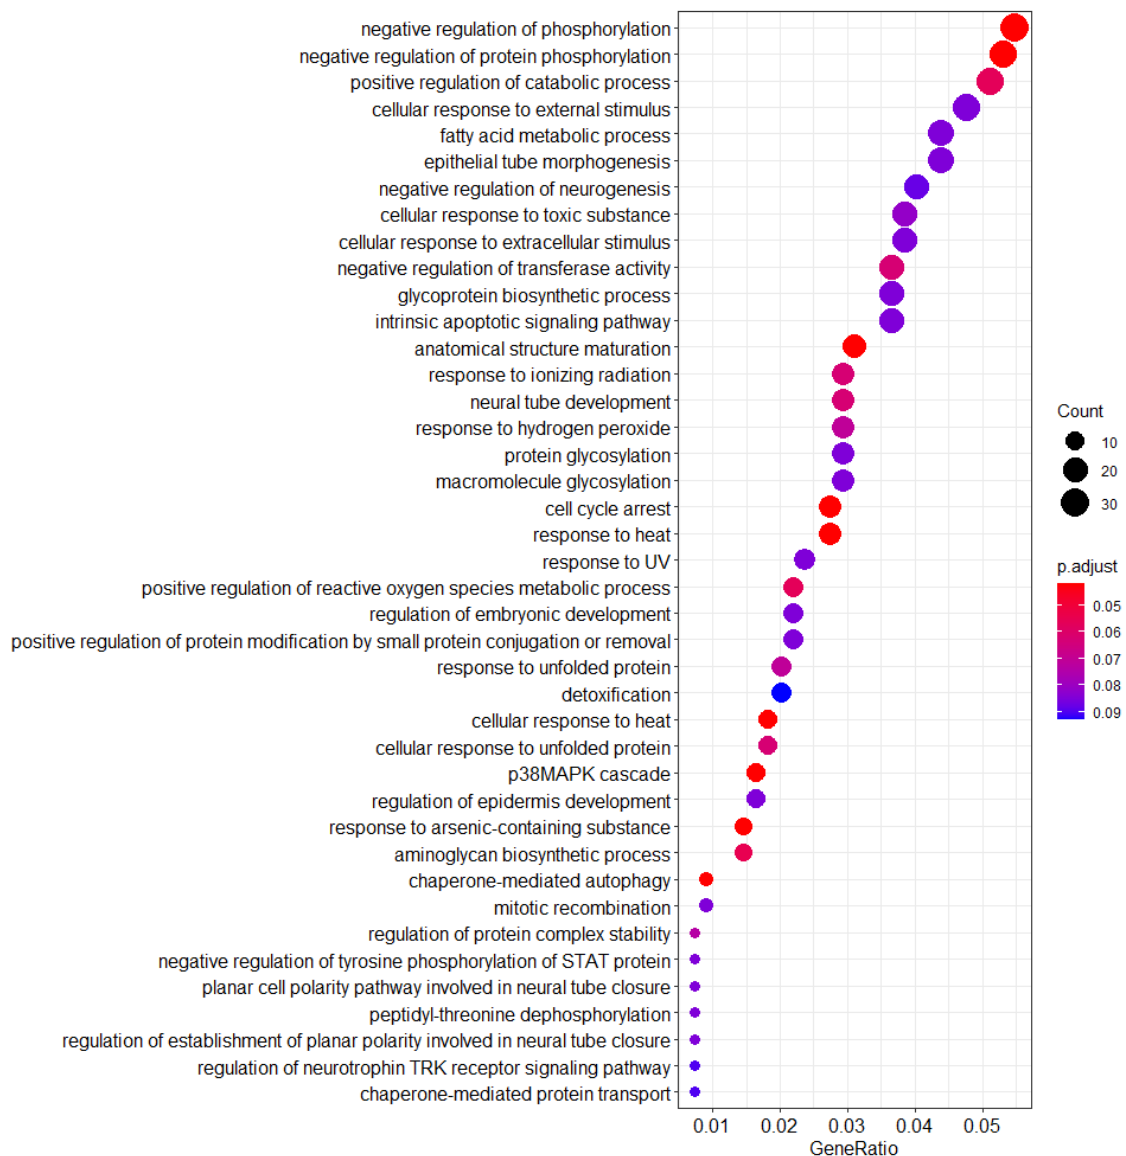

Figure S6. GO enrichment analysis among differentiated neuronal cells affected by neurotoxicity induced by ethacrynic acid

The enriched pathways were identified by p-value adjusted with the BH procedure  $< 0.1$  and ranked DEGs gene ratio in GO categories.

Table S1. The comparison of gene expression profiles between cells TDP-43 expressing and non-expressing (control) cells

| Gene Name | Description                                                                | q-value  | log2 fold-change |
|-----------|----------------------------------------------------------------------------|----------|------------------|
| Nusap1    | nucleolar and spindle associated protein 1 [Source:RGD Symbol;Acc:1305764] | 1.36E-14 | 1.12E+00         |
| Ninl      | ninein-like [Source:RGD Symbol;Acc:1306152]                                | 8.95E-25 | 1.30E+00         |
| Tardbp    | TAR DNA binding protein [Source:RGD Symbol;Acc:1310906]                    | 0.00E+00 | 4.06E+00         |
| Tnfsf9    | TNF superfamily member 9 [Source:RGD Symbol;Acc:727974]                    | 9.26E-14 | 1.04E+00         |
| Dok7      | docking protein 7 [Source:RGD Symbol;Acc:1566416]                          | 4.51E-24 | 1.44E+00         |
| Fam161a   | FAM161 centrosomal protein A [Source:RGD Symbol;Acc:1304999]               | 2.14E-14 | 1.03E+00         |
| Ccnf      | cyclin F [Source:RGD Symbol;Acc:67401]                                     | 2.51E-14 | 1.05E+00         |
| Tnfrsf19  | TNF receptor superfamily member 19 [Source:RGD Symbol;Acc:1564996]         | 1.12E-50 | 1.30E+00         |
| Serpinb1a | serpin family B member 1A [Source:RGD Symbol;Acc:1306203]                  | 4.48E-12 | 1.03E+00         |
| Vgf       | VGF nerve growth factor inducible [Source:RGD Symbol;Acc:69399]            | 2.47E-12 | 1.05E+00         |
| Mmp11     | matrix metalloproteinase 11 [Source:RGD Symbol;Acc:3099]                   | 3.40E-13 | 1.02E+00         |

Table S2. Expression levels of genes related to PI metabolism pathways between the Control (Group 1) and the TDP43+EA groups (Group 3)

| Ingenuity Canonical Pathways                            | -log(B-H p-value) | log2 Ratio |
|---------------------------------------------------------|-------------------|------------|
| 3-phosphoinositide Degradation                          | 2.05E+00          | 1.11E-01   |
| D-myo-inositol-5-phosphate Metabolism                   | 1.95E+00          | 1.09E-01   |
| Superpathway of Inositol Phosphate Compounds            | 1.95E+00          | 1.03E-01   |
| D-myo-inositol (1,4,5,6)-Tetrakisphosphate Biosynthesis | 1.77E+00          | 1.07E-01   |
| D-myo-inositol (3,4,5,6)-tetrakisphosphate Biosynthesis | 1.77E+00          | 1.07E-01   |
| 3-phosphoinositide Biosynthesis                         | 1.54E+00          | 9.85E-02   |

Table S3. List of qPCR primers used in experiments in Figure 6

|                           |
|---------------------------|
| Hmox1(Ho-1)_Rn00561387_m1 |
| Sqstm1_Rn00709977_m1      |
| Pik3cb_Rn00585107_m1      |
| Nfe2l2_Rn00582415_m1      |
| Plcg2_Rn01431998_m1       |
| Stip1_Rn01647759_g1       |
| Nefl_Rn00582365_m1        |
| Acsl6_Rn00590587_m1       |
| Mt2A,Mt1m_Rn01536588_gH   |
| GlrX_Rn00574074_m1        |
| Alpl_Rn01516028_m1        |
| Nup43_Rn01440850_m1       |
| Actb_Rn00667869_m1        |
